# Supplementary material for: Insight into the Structure, Dynamics and the Unfolding Property of Amylosucrases: Implications of Rational Engineering on Thermostability
Source: PLoS One. 2012 Jul 6;7(7):e40441. doi: 10.1371/journal.pone.0040441 (PMC3391273; doi:10.1371/journal.pone.0040441)
Supplement: Table S3 — The free energy calculation for the proline residues of NpAS and DgAS. (DOC) [file pone.0040441.s005.doc]

Table S3 The free energy calculation for the proline residues of NpAS and DgAS

|  | Proline residues | | |  | Proline residues | | |
| --- | --- | --- | --- | --- | --- | --- | --- |
| Domain | NpAS | DgAS | ΔΔG(kcal·mol-1) | Domain | NpAS | DgAS | ΔΔG(kcal·mol-1) |
| N | P2 | - | - | A | P90 | P83 | - |
| P17 | - | - | P120 | D113 | -0.89 |
| P41 | E36 | -1.08 | P134 | P127 | - |
| P59 | P54 | - | C138 | P131 | 1.67 |
| N76 | P69 | -1.96 | P139 | R132 | 4.00 |
| B | P203 | P196 | - | P157 | P150 | - |
| P213 | P206 | - | P262 | P260 | - |
| P218 | P211 | - | P303 | P301 | - |
| R226 | P219 | -0.5 | P321 | P319 | - |
| P230 | P223 | - | P333 | P331 | - |
| P234 | P227 | - | P351 | N354 | 0.41 |
| B' | D427 | P430 | -1.0 | H377 | P380 | 2.24 |
| P435 | V438 | -0.49 | N378 | P381 | -1.37 |
| P440 | P443 | - | P380 | P383 | - |
| C | N560 | P573 | -0.58 | P462 | P469 | - |
| N562 | P575 | 5.53 | P482 | P493 | - |
| - | P587 | - | S502 | P513 | -1.87 |
| P585 | T601 | -0.34 | D506 | P517 | 0.77 |
| T589 | P605 | -2.11 | P514 | P525 | - |
| P597 | L613 | 6.9 | P527 | P539 | - |
| D614 | P631 | -0.69 | A530 | P542 | -1.51 |
| P619 | G637 | -1.25 | P549 | P561 | - |
| - | P649 | - |  |  |  |  |
